# Supplementary material for: Robustness of Deep Learning Algorithm to Varying Imaging Conditions in Detecting Low Contrast Objects in Computed Tomography Phantom Images: In Comparison to 12 Radiologists
Source: MDPI journal article supplement (doi:10.3390/diagnostics11030410), 2021-02-28
Supplement: s1 [file s1]

**Supplementary Table S1.** Object Detection Using Template Matching Method.

|                       | Template Matching (5 mm) | Template Matching (9 mm) |
|-----------------------|--------------------------|--------------------------|
| <b>Total</b>          | 0.731 (0.692–0.769)      | 0.669 (0.627–0.710)      |
| <b>Radiation Dose</b> |                          |                          |
| 26 mAs                | 0.712 (0.633–0.792)      | 0.681 (0.596–0.765)      |
| 50 mAs                | 0.655 (0.570–0.740)      | 0.616 (0.528–0.703)      |
| 100 mAs               | 0.773 (0.702–0.845)      | 0.695 (0.613–0.777)      |
| 200 mAs               | 0.855 (0.798–0.912)      | 0.752 (0.678–0.828)      |
| <b>Reconstruction</b> |                          |                          |
| FBP                   | 0.716 (0.660–0.772)      | 0.661 (0.601–0.721)      |
| ADMIRE                | 0.757 (0.704–0.810)      | 0.688 (0.630–0.746)      |
| <b>Object Size</b>    |                          |                          |
| 5 mm                  | 0.626 (0.565–0.687)      | 0.511 (0.447–0.574)      |
| 9 mm                  | 0.836 (0.792–0.879)      | 0.822 (0.778–0.866)      |

Data are the AUC with 95% CIs in parentheses. AUC = area under receiver operating characteristics curve, CI = confidence interval, FBP = filtered back projection, ADMIRE = advanced modeled iterative reconstruction.
